# Supplementary material
Source: JCI journal article supplement (doi:10.1172/jci139019)
Supplement: sd1 [file 1]

1 **Supplementary information**

2

3 **Epithelial miR-141 regulates IL-13-induced airway mucus production**

4 Sana Siddiqui<sup>\*1,2</sup>, Kristina Johansson<sup>\*1,2,3</sup>, Alex Joo<sup>1,2</sup>, Luke R. Bonser<sup>4,5</sup>, Kyung Duk Koh<sup>4,5</sup>,  
5 Olivier Le Tonqueze<sup>4,5</sup>, Samaneh Bolourchi<sup>1,2</sup>, Rodriel A. Bautista<sup>1,2</sup>, Lorna Zlock<sup>6</sup>, Theodore  
6 L. Roth<sup>3,7,8,9</sup>, Alexander Marson<sup>3,9,10,11,12,13</sup>, Nirav R. Bhakta<sup>1</sup>, K. Mark Ansel<sup>2,3</sup>, Walter E.  
7 Finkbeiner<sup>6</sup>, David J. Erle<sup>4,5</sup>, Prescott G. Woodruff<sup>1,2,5,¶</sup>

8

9 <sup>1</sup>Department of Medicine, Division of Pulmonary and Critical Care Medicine, University of  
10 California, San Francisco, <sup>2</sup>Sandler Asthma Basic Research Center, University of California,  
11 San Francisco, <sup>3</sup>Department of Microbiology and Immunology, University of California, San  
12 Francisco, <sup>4</sup>Lung Biology Center, University of California, San Francisco, <sup>5</sup>Cardiovascular  
13 Research Institute, University of California, San Francisco, <sup>6</sup>Department of Pathology,  
14 University of California, San Francisco, <sup>7</sup>Biomedical Sciences Graduate Program, University  
15 of California, San Francisco, <sup>8</sup>Diabetes Center, University of California, San Francisco,  
16 <sup>9</sup>Innovative Genomics Institute, University of California, Berkeley, <sup>10</sup>J. David Gladstone  
17 Institutes, San Francisco, <sup>11</sup>Department of Medicine, Division of Infectious Diseases,  
18 University of California, San Francisco, <sup>12</sup>Parker Institute for Cancer Immunotherapy, San  
19 Francisco and <sup>13</sup>Chan Zuckerberg Biohub, San Francisco, CA, USA

20 <sup>¶</sup>Corresponding author

21 \* Equal contribution

22

23 **Supplementary methods**

24 **Cell culture conditions**

25 Culture plates and inserts were precoated with human placental collagen (15 µg/cm<sup>2</sup>) (1).  
26 Human bronchial epithelial cells (HBECs) were seeded in medium that consisted of a 3:1  
27 ratio of F12 and DMEM (MediaTech, ThermoFisher Scientific, Emeryville, CA) and was  
28 supplemented with 5% heat inactivated FBS, 100 U/ml penicillin, 100 µg/ml streptomycin, 10  
29 µg/ml gentamicin, 250 ng/ml fungizone (UCSF Cell Culture Facility, San Francisco, CA), 5  
30 µg/ml bovine insulin, 8.4 ng/ml cholera toxin, 25 ng/ml hydrocortisone (Sigma-Aldrich, St.  
31 Louis, MO) and 10 ng/ml rh-EGF (Atlanta Biologicals, Flowery Branch, GA). Rho-associated  
32 protein kinase inhibitor Y-27632 (10 µM, ‘ROCK inhibitor’, Enzo Life Sciences,  
33 Farmingdale, NY) was added right before use. Culture medium used for cells grown at air-

34 liquid-interface (ALI) consisted of 1:1 ratio of LHC Basal Medium and DMEM supplemented  
35 with 0.5 mg/ml BSA, 0.24 mg protein/ml BPE, 5 µg/ml bovine insulin, 10 µg/ml transferrin,  
36 0.1 µM hydrocortisone (Sigma-Aldrich), 0.01 µM triiodothyronine, 2.7 µM epinephrine, 0.5  
37 ng/ml rh-EGF (Atlanta Biologicals), 0.05 µM retinoic acid, 0.5 µM phosphorylethanolamine,  
38 0.5 µM ethanolamine, 3 µM zinc sulfate, 100 U/ml penicillin, 100 µg/ml streptomycin and 2  
39 mM L-glutamine (UCSF Cell Culture Facility).

40

#### 41 **Preparation of crRNAs**

42 crRNAs were resuspended in 150 mM KCl and 10 mM Tris-HCl, pH 7.4. We prepared the  
43 ribonucleoprotein (RNP) complex by first incubating 160 µM, 1 µL of crRNA (Dharmacon,  
44 Lafayette, CO) with 160 µM, 1 µL tracrRNA, at 37°C for 30 min yielding 80 µM gRNA. The  
45 80 µM gRNA was then added 1:1 with 40 µM, 2 µL rCas9, recombinant Cas9 (MacroLab,  
46 Berkeley, CA), yielding 20 µM RNP, which was incubated at 37°C for 15 min. An  
47 electroporation enhancer DNA oligonucleotide (100 µM, 1 µL) was added to the RNP to  
48 enhance efficiency of the delivery of the complex to the cells (2).

49

#### 50 **Preparation of HBECs for flow cytometry**

51 ALI cultured HBECs were harvested on day 28 for analysis by flow cytometry. At harvest, 10  
52 mM DTT (ThermoFisher Scientific) in PBS with Ca<sup>2+</sup>Mg<sup>2+</sup> (Corning, Corning, NY) was  
53 added to the apical compartment and incubated for 10 min at 37°C. DTT wash was collected  
54 for dot blot analysis (described below). Cells were washed with PBS, then incubated for a  
55 maximum of 15 min at 37°C in 0.25% trypsin with 2.21 mM EDTA (Corning) which was  
56 added to the apical and basolateral compartments. Cell culture medium containing 5% FBS  
57 was added to neutralize the enzymatic activity and cells were washed in PBS followed by

58 fixation in 4% PFA (ThermoFisher Scientific) for 8 min on ice. Cells were washed in PBS  
59 and finally resuspended in plain PBS and stored at -80°C until analysis.

60

### 61 **Secreted MUC5AC by dot blot**

62 At harvest, the apical compartment of ALI cultured HBECs were washed with 10 mM DTT  
63 for 10 minutes at 37°C. The washes were stored at -80°C until analysis. Dot blot was adapted  
64 from the slot blot technique described earlier (3) and as performed previously (4). Following  
65 thawing, samples were diluted and spotted on to nitrocellulose. The membrane was allowed to  
66 dry, blocked in 4% milk, then stained with an anti-MUC5AC primary antibody (MAN-5ACI;  
67 gift from David J. Thornton, University of Manchester, Manchester, UK) (5). The blot was  
68 subsequently incubated with a HRP conjugated anti-rabbit secondary antibody and detected  
69 using TMB peroxidase substrate (Vector).

70

### 71 **Histologic staining and immunofluorescence**

72 6.5 mm ALI filters inserts were collected day 28 and placed in Carnoy's solution (6:3:1 ratios  
73 of methanol, chloroform, glacial acetic acid) for 30 min at RT as described previously (4).  
74 Briefly, filters were washed in concentrated methanol (2x20 min) followed by 4-5 washes in  
75 PBS. The filters were embedded in paraffin and cut in 5 µm sections that were later stained  
76 with Hematoxylin and Eosin (H&E), AB-PAS and fluorescent antibodies. H&E staining and  
77 AB-PAS staining was performed on deparaffinized sections according to standard protocol as  
78 previously described (6). Sections were hydrated and AB-PAS stained sections were placed in  
79 3% acetic acid for 3 min followed by 1% alcian blue pH 2.5 for 30 min. Sections were then  
80 washed in tap water followed by DI water. 10 min incubation in 1% periodic acid was used to  
81 oxidize the sections, they were then washed in tap water and DI water. Sections were placed  
82 in Shiff's reagent for 20 min followed by 10 min wash in tap water and 30 sec incubation in

83 Mayer's Hematoxylin. 1 min wash in tap water was followed by 10 sec incubation in lithium  
84 carbonate. Sections were dehydrated according to standard protocol and mounted using  
85 Cytoseal™ (ThermoFisher Scientific).

86 Immunofluorescence staining was done as previously described (6) using primary  
87 antibodies mouse monoclonal anti-MUC5AC (1:200 dilution) and rabbit polyclonal anti-  
88 MUC5B (1:200 dilution). After washing, slides were incubated with secondary antibodies  
89 Alexa Fluor® 488 goat anti-mouse and Alexa Fluor® 647 goat anti-rabbit (at 1:200 dilution  
90 for 2h, Jackson ImmunoResearch Laboratories, West Grove, PA) DAPI was used to stain  
91 nuclei.

92

### 93 **Periodic-Acid Schiff (PAS) staining**

94 Lung tissue from allergen-challenged mice treated with mmu-miR-141-3p antagomir or  
95 scrambled antagomir and saline-challenged control mice was fixed in formalin and processed  
96 as previously described (7). Assessment of PAS<sup>+</sup> cells was performed on blinded lung tissue  
97 sections and analyzed using Image J Software (NIH, LOCI, University of Wisconsin).  
98 Airways with a basement perimeter ( $P_{BM}$ ) >0.80 mm were considered as central airways  
99 ('large airways') and a  $P_{BM}$  <0.80 mm was considered peripheral airways ('small airways')  
100 and was based on a previous report (8).

101

### 102 **Analysis of miR-141 gene targets**

103 DIANA-microT (9,10) was used to obtain genomic coordinates of mmu-miR-141-3p binding  
104 sites of target genes predicted by TargetScan v.7.2 (8mer, 7merM8 and 7merA1 motifs).  
105 CLEAR-CLIP sequencing data was downloaded from the Gene Expression Omnibus (GEO)  
106 at GSE102716, published by Bjerke and Yi 2020 (11). Perfect overlap of genomic target sites  
107 and CLEAR-CLIP miR-141-3p peaks in wild type or miR-200 family induced epithelial cells,

108 and absence of miR-141-3p CLEAR-CLIP peak in miR-200 family deficient cells were  
109 considered experimentally confirmed miR-141 targets.

110

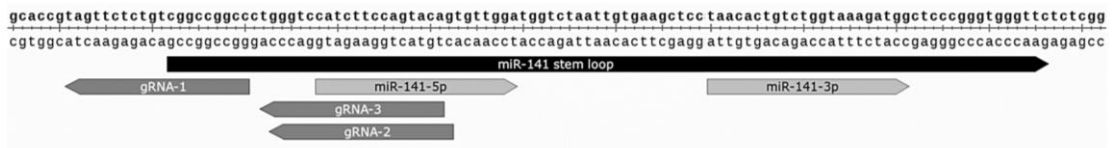

111

112 **Supplementary Figure S1. CRISPR gRNA design for targeted knockdown of *MIR141***  
 113 **gene.**

114 Human miR-141 stem loop is highlighted in black, mature hsa-miR-141-5p and hsa-miR-141-  
 115 3p regions within the stem loop are highlighted in light grey and three CRISPR guide RNAs  
 116 (gRNA-1, gRNA-2, gRNA-3) are shown in dark grey. Guide sequences are provided in  
 117 supplementary Table S4.

118

119

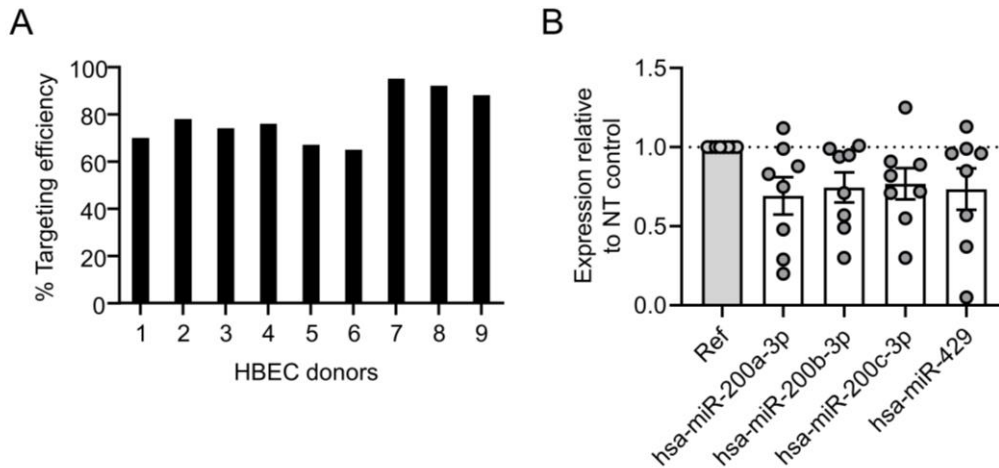

120

121 **Supplementary Figure S2. Targeting efficiency and TaqMan qPCR.**

122 **A:** Targeting efficiency of *MIR141* gRNAs assessed by Sanger DNA sequencing and ICE  
 123 Synthego analysis (n=9 unique HBEC donors). **B:** Expression level of miR-141/200 family  
 124 miRNAs (except hsa-miR-141, shown in Fig 2D) by TaqMan qPCR following administration  
 125 of *MIR141*-targeting versus non-targeting (NT) gRNAs normalized to reference miRNAs hsa-  
 126 miR-103a-3p and hsa-miR-191-5p ('Ref').

127

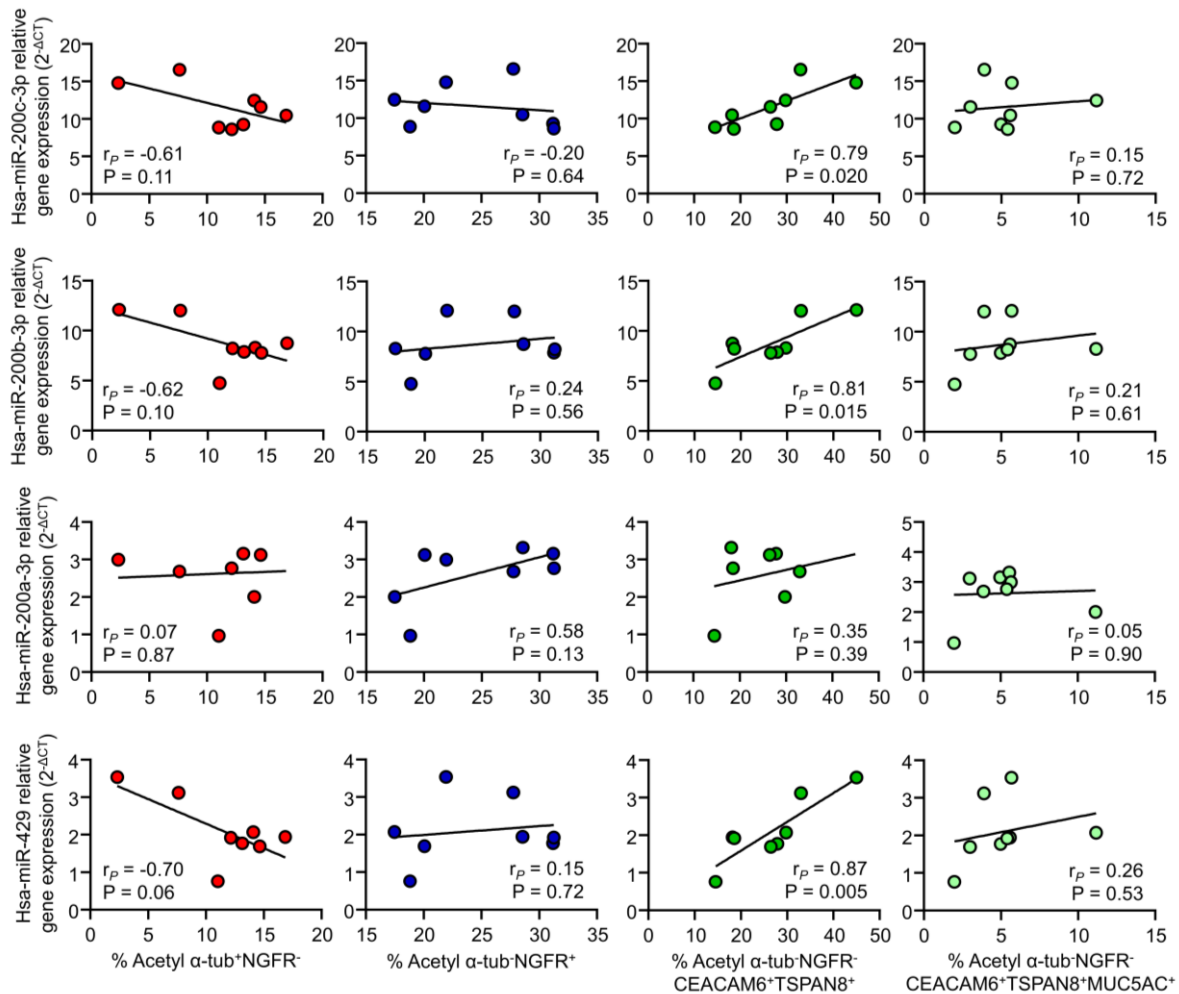

128

129 **Supplementary Figure S3. Expression levels of miR-141/200 family miRNAs correlate**  
 130 **with distinct epithelial subsets.**

131 Frequency of ciliated cells (acetylated  $\alpha$ -tubulin<sup>+</sup>NGFR<sup>-</sup>), basal cells (acetylated  $\alpha$ -tubulin<sup>-</sup>  
 132 NGFR<sup>+</sup>), secretory cells (acetylated  $\alpha$ -tubulin<sup>-</sup>NGFR<sup>-</sup>CEACAM6<sup>+</sup>TSPAN8<sup>+</sup>) and mucus-  
 133 producing goblet cells (acetylated  $\alpha$ -tubulin<sup>-</sup>NGFR<sup>-</sup>CEACAM6<sup>+</sup>TSPAN8<sup>+</sup>MUC5AC<sup>+</sup>)  
 134 assessed by Flow cytometry are plotted against the expression level of miR-141/200 family  
 135 miRNAs determined by TaqMan qPCR. Epithelial cells were grown at air-liquid interface  
 136 (ALI) with IL-13. N=8.  $r_P$ , Pearson correlation coefficient.

137

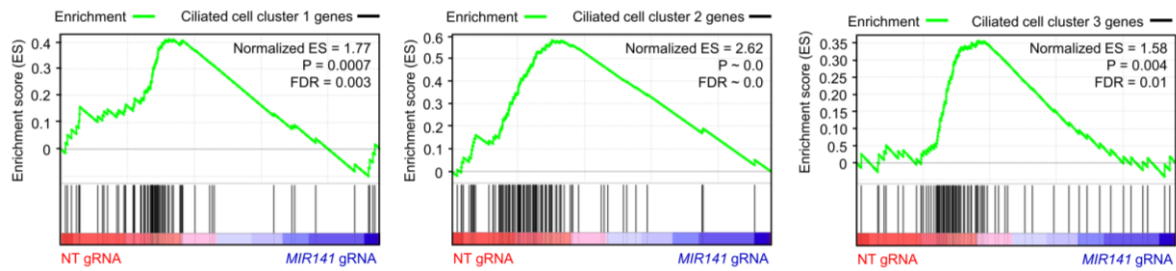

138

139 **Supplementary Figure S4. Gene set enrichment analysis of ciliated cell gene clusters.**  
 140 Single cell RNA sequencing analysis of bronchial epithelial brushings obtained from allergic  
 141 asthmatic subjects identified distinct epithelial cell clusters. Gene set enrichment analysis of  
 142 positively expressed ciliated cell genes in cluster 1, 2 and 3 (provided in Supplementary Table  
 143 S3) in HBEC cultures that have undergone gene-editing with non-targeting (NT) or *MIR141*  
 144 gRNA, subsequently grown at air-liquid-interface (ALI) with IL-13 stimulation.

145

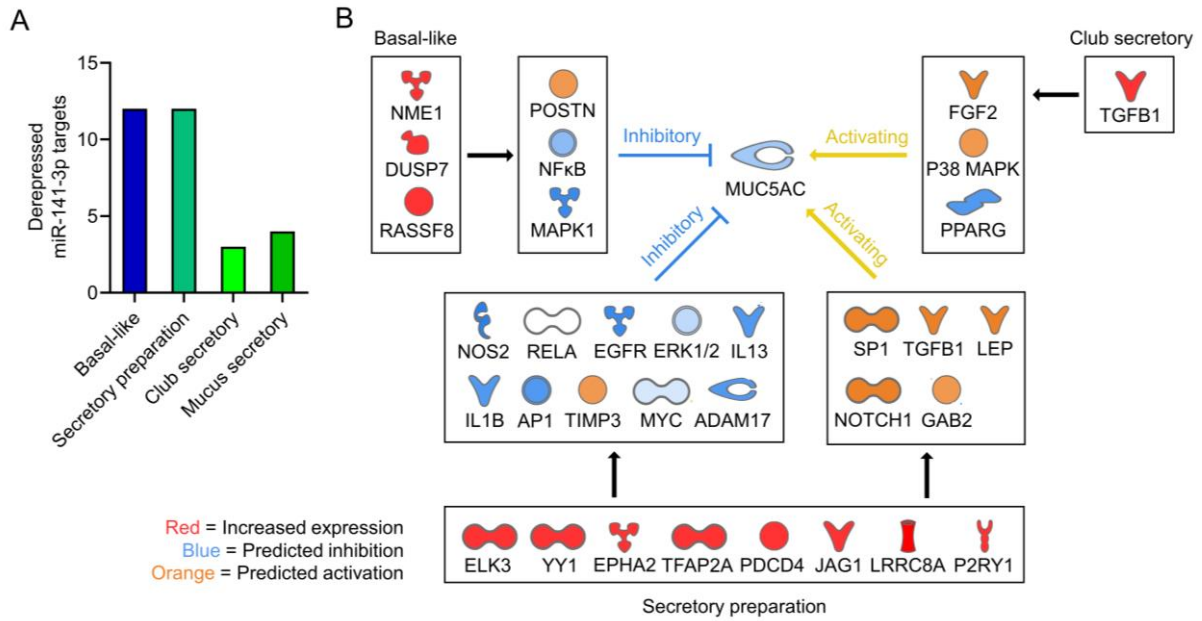

146

147 **Supplementary Figure S5. Net effect of miR-141-target gene derepression by IPA**  
 148 **predicts inhibition of MUC5AC expression.**

149 **A:** Most derepressed miR-141-3p-target genes in HBECs that have undergone gene-editing  
 150 with *MIR141* gRNAs compared to NT controls belongs to early basal-like and secretory  
 151 preparation clusters (determined by pseudotime gene expression analysis (12)). **B:** Ingenuity  
 152 Pathway Analysis (IPA) of connecting derepressed genes (increased activity, red) to  
 153 downstream MUC5AC expression identifies inhibitory (light blue) and activating (yellow)  
 154 pathways. Net effect of increased activity of derepressed target genes results in inhibition of  
 155 MUC5AC expression (light blue).

156

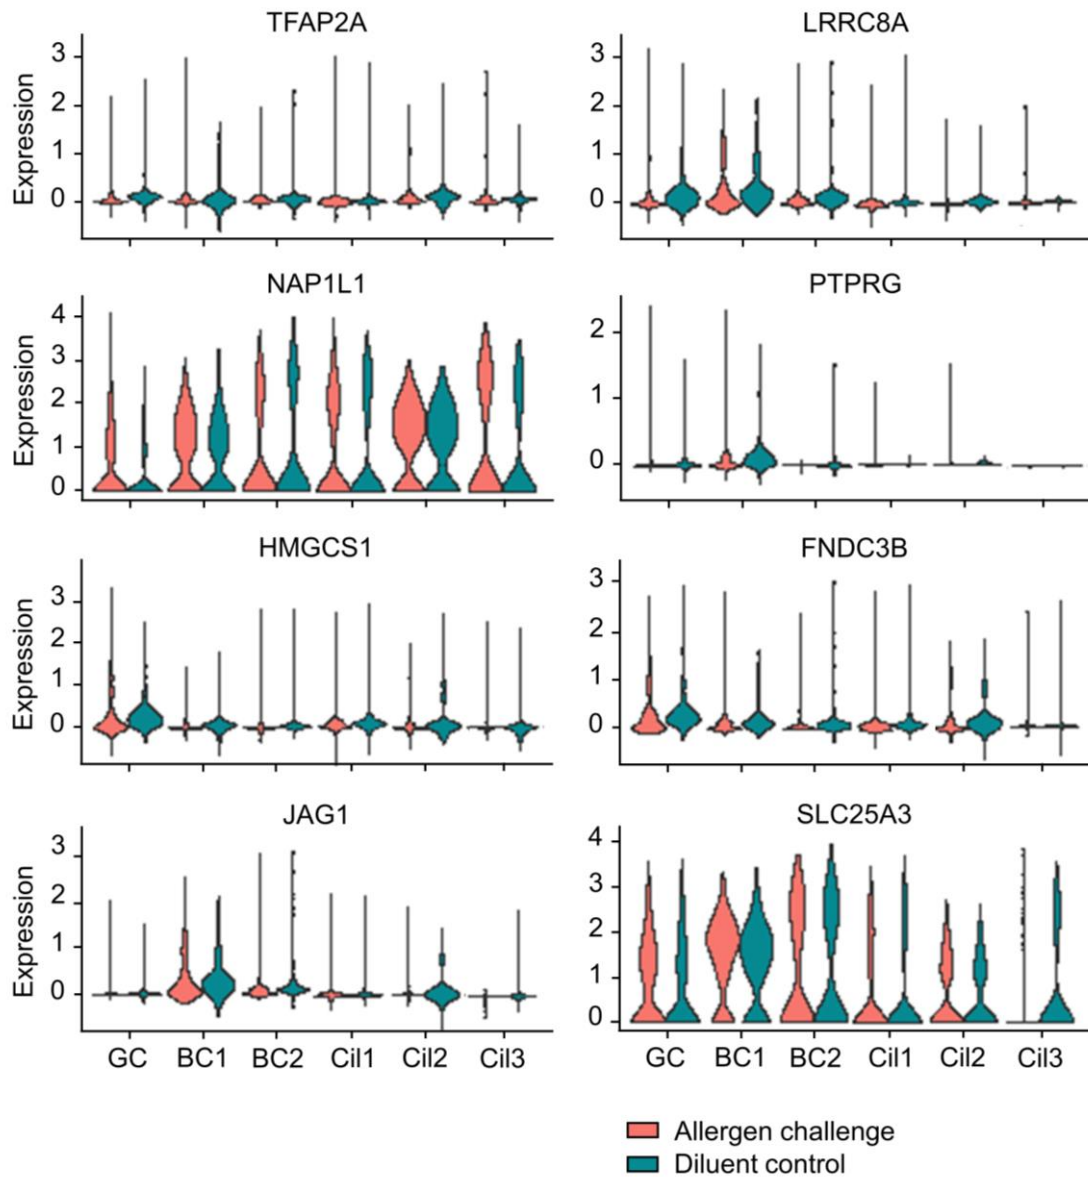

157

158 **Supplementary Figure S6. miR-141 target genes broadly detected in epithelial**  
 159 **subpopulations by scRNA-seq.**

160 Gene expression by single cell RNA sequencing of bronchial epithelial brushings obtained  
 161 from allergic asthmatic subjects 24h post segmental allergen challenge (n=4) or diluent  
 162 control (n=4).

163

164 **Table S1. Patient demographics TaqMan qPCR (Figure 1C-E).**

| <b>Subject</b>                              | <b>1</b> | <b>2</b> | <b>3</b> | <b>4</b> | <b>5</b> | <b>6</b> | <b>7</b> |
|---------------------------------------------|----------|----------|----------|----------|----------|----------|----------|
| <b>Age</b>                                  | 29       | 24       | 30       | 42       | 18       | 34       | 29       |
| <b>Sex</b>                                  | F        | F        | M        | F        | M        | M        | F        |
| <b>Race</b>                                 | White    | Asian    | White    | White    | White    | White    | White    |
| <b>BMI (kg/m<sup>2</sup>)</b>               | 25.7     | 32.0     | 24.5     | 25.6     | 26.6     | 26.4     | 38.4     |
| <b>Allergen</b>                             | Cat      | HDM      | HDM      | HDM      | HDM      | HDM      | HDM      |
| <b>Serum IgE (IU/mL)</b>                    | 102      | 226      | 30       | 30       | 343      | 149      | 68       |
| <b>FEV1 (L)</b>                             | 4.10     | 2.90     | 3.76     | 2.64     | 4.02     | 4.25     | 3.21     |
| <b>FEV1 (%)</b>                             | 116.6    | 100.2    | 79.7     | 91.5     | 110.8    | 93.5     | 94.4     |
| <b>FVC (L)</b>                              | 4.62     | 3.85     | 5.39     | 3.49     | 5.48     | 6.57     | 3.82     |
| <b>FVC (%)</b>                              | 110.4    | 115.6    | 95.1     | 98.4     | 132.4    | 116.3    | 94.5     |
| <b>FeNO (ppb)</b>                           | 33       | 24       | 39       | 32       | 42       | 19       | 18       |
| <b>Blood Eosinophils (10<sup>9</sup>/L)</b> | 0.07     | 0.16     | 0.13     | 0.08     | 0.06     | 0.12     | 0.16     |

165 Forced expiratory volume in one second, FEV1; Forced vital capacity, FVC; House dust mite,  
 166 HDM.

167

168 **Table S2. Patient demographics scRNA-seq (Figure 5A-C; Figure 6; Figure 7F;**  
 169 **Supplementary Figure S6; Supplementary Table S3).**

| <b>Subject</b>                              | <b>1</b> | <b>2</b>            | <b>3</b>                  | <b>4</b> |
|---------------------------------------------|----------|---------------------|---------------------------|----------|
| <b>Age</b>                                  | 42       | 29                  | 24                        | 18       |
| <b>Sex</b>                                  | M        | F                   | M                         | M        |
| <b>Race</b>                                 | White    | Declined to specify | Black or African American | White    |
| <b>BMI (kg/m<sup>2</sup>)</b>               | 18.9     | 24.8                | 24.8                      | 26.6     |
| <b>Allergen</b>                             | HDM      | Cat                 | HDM                       | HDM      |
| <b>Serum IgE (IU/mL)</b>                    | 85       | 433                 | 695                       | 343      |
| <b>FEV1 (L)</b>                             | 3.33     | 2.91                | 3.98                      | 4.02     |
| <b>FEV1 (%)</b>                             | 77.2     | 95.6                | 112.5                     | 110.8    |
| <b>FVC (L)</b>                              | 5.56     | 3.74                | 4.62                      | 5.48     |
| <b>FVC (%)</b>                              | 101.8    | 104.8               | 111.4                     | 132.4    |
| <b>FeNO (ppb)</b>                           | 77       | 9                   | 67                        | 42       |
| <b>Blood Eosinophils (10<sup>9</sup>/L)</b> | 0.19     | 0.06                | 0.24                      | 0.06     |

170 Forced expiratory volume in one second, FEV1; Forced vital capacity, FVC; House dust mite,  
 171 HDM.

172

173

174

175

176

177 **Table S3. scRNA-seq clusters (Figure 5A-C; Figure 6; Figure 7F; Supplementary Figure**  
178 **S6).**

179 Provided as Excel spreadsheet.

180

181 **Table S4. crRNA sequences.**

| <b>Name</b>                | <b>crRNA target DNA sequence (5'-3')</b> | <b>Manufacturer</b>                |
|----------------------------|------------------------------------------|------------------------------------|
| Hsa-miR-141-3p gRNA-1      | GGCCGGCCGACAGAGAACTA                     | Dharmacon                          |
| Hsa-miR-141-3p gRNA-2      | CTGTACTGGAAGATGGACCC                     | Dharmacon                          |
| Hsa-miR-141-3p gRNA-3      | TGTACTGGAAGATGGACCCA                     | Dharmacon                          |
| SPDEF-1                    | GGAGAGCTGGACCGACAGCG                     | Dharmacon                          |
| SPDEF-2                    | ATGAAGCGGCCATAGCTGTG                     | Dharmacon                          |
| Non-targeting control (NT) | GATACGTCCGTACCGGACCG                     | Dharmacon<br>CatalogU-007501-01-05 |

182

**Table S5. Sequences for PCR primers, DNA sequencing primers, RT-PCR primers and antagomirs used in the study.**

| Name                                   | Primer sequence (5'-3')                        | Manufacturer                | Application                    |
|----------------------------------------|------------------------------------------------|-----------------------------|--------------------------------|
| miR-141-Forward                        | TCGTCTTACCCAGCAGTGTGG                          | Integrated DNA Technologies | Amplification of target region |
| miR-141-Reverse                        | ACCTGAATCTCCCACTACTGC                          | Integrated DNA Technologies | Amplification of target region |
| SPDEF-Forward                          | CTCACTTGGCAAGAGCATCC                           | Integrated DNA Technologies | Amplification of target region |
| SPDEF-Reverse                          | CCATGTCAGATGTCCTCATCTG                         | Integrated DNA Technologies | Amplification of target region |
| miR-141-seq                            | TCTTGAGCTGAGAGCGTTGC                           | Integrated DNA Technologies | Sequencing, editing efficiency |
| SPDEF-seq                              | TGTCCCATGAGAGCTGCATA                           | Integrated DNA Technologies | Sequencing, editing efficiency |
| hsa/mmu-miR-141-3p-Forward             | ACACTCCAGCTGGGTAACACTGTCTGGTAA                 | Integrated DNA Technologies | miRNA expression               |
| hsa/mmu-miR-141-3p-Reverse             | CTCAACTGGTGTTCGTGGAGTCGGCAATT CAGTTGAGCCATCTTT | Integrated DNA Technologies | miRNA expression               |
| hsa/mmu-miR-141-3p-Probe               | TTCAGTTGAGCCATCTTT                             | Integrated DNA Technologies | miRNA expression               |
| hsa-miR-200a-3p-Forward                | ACACTCCAGCTGGGTAACACTGTCTGGTAA                 | Integrated DNA Technologies | miRNA expression               |
| hsa-miR-200a-3p-Reverse                | CTCAACTGGTGTTCGTGGAGTCGGCAATT CAGTTGAGACATCGTT | Integrated DNA Technologies | miRNA expression               |
| hsa-miR-200a-3p-Probe                  | TTCAGTTGAGACATCGTT                             | Integrated DNA Technologies | miRNA expression               |
| hsa-miR-200b-3p-Forward                | ACACTCCAGCTGGGTAATACTGCCTGGTAA                 | Integrated DNA Technologies | miRNA expression               |
| hsa-miR-200b-3p-Reverse                | CTCAACTGGTGTTCGTGGAGTCGGCAATT CAGTTGAGTCATCATT | Integrated DNA Technologies | miRNA expression               |
| hsa-miR-200b-3p-Probe                  | TTCAGTTGAGTCATCATT                             | Integrated DNA Technologies | miRNA expression               |
| hsa-miR-200c-3p-Forward                | ACACTCCAGCTGGGTAATACTGCCGGGT AAT               | Integrated DNA Technologies | miRNA expression               |
| hsa-miR-200c-3p-Reverse                | CTCAACTGGTGTTCGTGGAGTCGGCAATT CAGTTGAGTCCATCAT | Integrated DNA Technologies | miRNA expression               |
| hsa-miR-200bc-3p-Probe                 | TTCAGTTGAGTCCATCAT                             | Integrated DNA Technologies | miRNA expression               |
| hsa-miR-429-Forward                    | ACACTCCAGCTGGGTAATACTGTCTGGTAA                 | Integrated DNA Technologies | miRNA expression               |
| hsa-miR-429-Reverse                    | CTCAACTGGTGTTCGTGGAGTCGGCAATT CAGTTGAGACGGTTTT | Integrated DNA Technologies | miRNA expression               |
| hsa-miR-429-Probe                      | TTCAGTTGAGACGGTTTT                             | Integrated DNA Technologies | miRNA expression               |
| mmu-miR-429-Forward                    | ACACTCCAGCTGGGTAATACTGTCTGGTAA                 | Integrated DNA Technologies | miRNA expression               |
| mmu-miR-429-Reverse                    | CTCAACTGGTGTTCGTGGAGTCGGCAATT CAGTTGAGACGGCATT | Integrated DNA Technologies | miRNA expression               |
| mmu-miR-429-Probe                      | TTCAGTTGAGACGGCATT                             | Integrated DNA Technologies | miRNA expression               |
| hsa-miR-103a-3p/mmu-miR-103-3p Forward | ACACTCCAGCTGGGAGCAGCATTGTACAGGG                | Integrated DNA Technologies | miRNA expression               |
| hsa-miR-103a-3p/mmu-miR-103-3p Reverse | CTCAACTGGTGTTCGTGGAGTCGGCAATT CAGTTGAGTCATAGCC | Integrated DNA Technologies | miRNA expression               |

|                                      |                                                                  |                             |                            |
|--------------------------------------|------------------------------------------------------------------|-----------------------------|----------------------------|
| hsa-miR-103a-3p/mmu-miR-103-3p Probe | TTCAGTTGAGTCATAGCC                                               | Integrated DNA Technologies | miRNA expression           |
| hsa/mmu-miR-191-5p Forward           | ACACTCCAGCTGGGCAACGGAATCCCAAAAG                                  | Integrated DNA Technologies | miRNA expression           |
| hsa/mmu-miR-191-5p Reverse           | CTCAACTGGTGTCTCGTGGAGTCGGCAATTCAGTTGAGCAGCTGCT                   | Integrated DNA Technologies | miRNA expression           |
| hsa/mmu-miR-191-5p Probe             | TTCAGTTGAGCAGCTGCT                                               | Integrated DNA Technologies | miRNA expression           |
| Universal Reverse                    | CTCAAGTGTCGTGGAGTCGGCA                                           | Integrated DNA Technologies | miRNA expression           |
| m-MUC5AC-Forward                     | GTCCAAGGAAAGTGAGGAACATG                                          | Integrated DNA Technologies | Mouse mRNA expression      |
| m-MUC5AC-Reverse                     | TACTGGAAAGGCCCAAGCAT                                             | Integrated DNA Technologies | Mouse mRNA expression      |
| m-MUC5AC-Probe                       | CCTCGCTGACCCTGAATGCCAACT                                         | Integrated DNA Technologies | Mouse mRNA expression      |
| m-Clca3- Forward                     | CTTCGGATCAGGTTTCAGAACAAAT                                        | Integrated DNA Technologies | Mouse mRNA expression      |
| m-Clca3- Reverse                     | CGATCGCCGCATTTCC                                                 | Integrated DNA Technologies | Mouse mRNA expression      |
| m-Clca3-Probe                        | TGTTGATGCTTTCGCAGCACTCTCCTC                                      | Integrated DNA Technologies | Mouse mRNA expression      |
| Mmu-anti-miR-141-3p Antagomir        | mC*mC*mAmUmCmUmUmUmAmCmCmA<br>mGmAmCmAmGmUmG*mU*mU*mA*-Chl       | Dharmacon                   | In vivo inhibition         |
| Scrambled Antagomir                  | mU*mC*mAmCmAmAmCmCmUmCmCmU<br>mAmGmAmAmAmGmA*mG*mU*mA*3'-<br>Chl | Dharmacon                   | In vivo inhibition control |

185 Antagomir sequence: mN, 2'OMe base; \*, phosphorothioate linkage; Chl, cholesterol

186

187 **Table S6. Antibodies.**

| <b>Antigen</b>              | <b>Clone</b> | <b>Fluorochrome</b> | <b>Manufacturer</b>                                                    | <b>Application</b> |
|-----------------------------|--------------|---------------------|------------------------------------------------------------------------|--------------------|
| Acetylated $\alpha$ tubulin | 6-11 B-1     | Alexa Fluor® 488    | Santa Cruz Biotechnology                                               | Flow cytometry     |
| MUC5AC                      | 45M1         | DyLight 488, PE     | Novus Biologicals                                                      | Flow cytometry     |
| CD66c/CEACAM6               | B6.2/CD66    | BV786               | BD Biosciences                                                         | Flow cytometry     |
| CD271/NGFR                  | ME20.4       | PE-Cy7              | BioLegend                                                              | Flow cytometry     |
| TSPAN8                      | FAB4734N     | Alexa Fluor® 700    | R&D Systems                                                            | Flow cytometry     |
| MUC5AC                      | MAN-5ACI     | n/a                 | Gift from Thornton lab,<br>University of Manchester,<br>Manchester, UK | Dot blot           |
| MUC5AC                      | 45M1         | n/a                 | ThermoFisher Scientific                                                | Immunofluorescence |
| MUC5B                       | H-300        | n/a                 | Santa Cruz Biotechnology                                               | Immunofluorescence |
| Goat-anti rabbit            | n/a          | Alexa Fluor® 647    | Jackson ImmunoResearch<br>Laboratories                                 | Immunofluorescence |
| Goat anti-mouse             | n/a          | Alexa Fluor® 488    | Jackson ImmunoResearch<br>Laboratories                                 | Immunofluorescence |

188

189 **Supplementary references**

- 190 1. Coleman DL, Tuet IK, Widdicombe JH. Electrical properties of dog tracheal epithelial  
191 cells grown in monolayer culture. *Am J Physiol*. 1984;246(3 Pt 1):C355-359.
- 192 2. Roth TL, et al. Reprogramming human T cell function and specificity with non-viral  
193 genome targeting. *Nature*. 2018;559(7714):405–9.
- 194 3. Harrop CA, Thornton DJ, McGuckin MA. Detecting, Visualising, and Quantifying  
195 Mucins. *Methods Mol Biol*. 2012;842:49-66.
- 196 4. Bonser LR, Zlock L, Finkbeiner W, Erle DJ. Epithelial tethering of MUC5AC-rich mucus  
197 impairs mucociliary transport in asthma. *J Clin Invest*. 2016;126(6):2367–71.
- 198 5. Sheehan JK, et al. Physical characterization of the MUC5AC mucin: a highly oligomeric  
199 glycoprotein whether isolated from cell culture or in vivo from respiratory mucous  
200 secretions. *Biochem J*. 2000;347(Pt 1):37–44.
- 201 5. Koh KD, et al. Efficient RNP-Directed Human Gene Targeting Reveals SPDEF is  
202 Required for IL-13-Induced Mucostasis. *Am J Respir Cell Mol Biol*. 2020;62(3):373-381.
- 203 7. Siddiqui S, et al. The modulation of large airway smooth muscle phenotype and effects of  
204 epidermal growth factor receptor inhibition in the repeatedly allergen-challenged rat. *Am*  
205 *J Physiol Lung Cell Mol Physiol*. 2013;304(12):L853–62.
- 206 8. Pinelli V, Marchica CL, Ludwig MS. Allergen-induced asthma in C57Bl/6 mice: hyper-  
207 responsiveness, inflammation and remodelling. *Respir Physiol Neurobiol*.  
208 2009;169(1):36–43.
- 209 9. Reczko M, Maragkakis M, Alexiou P, Grosse I, Hatzigeorgiou AG. Functional  
210 microRNA targets in protein coding sequences. *Bioinformatics*. 2012;28(6):771–6.
- 211 10. Paraskevopoulou MD, Georgakilas G, Kostoulas N, Vlachos IS, Vergoulis T, Reczko M,  
212 et al. DIANA-microT web server v5.0: service integration into miRNA functional  
213 analysis workflows. *Nucleic Acids Res*. 2013;41(Web Server issue):W169-173.
- 214 11. Bjerke GA, Yi R. Integrated analysis of directly captured microRNA targets reveals the  
215 impact of microRNAs on mammalian transcriptome. *RNA*. 2020;26(3):306–23.
- 216 12. Goldfarbmuren KC, et al. Dissecting the cellular specificity of smoking effects and  
217 reconstructing lineages in the human airway epithelium. *Nat Commun*. 2020;11(1):2485.
